# Supplementary material for: Integrated Assessment of Pharmacological and Nutritional Cardiovascular Risk Management: Blood Pressure Control in the DIAbetes and LifEstyle Cohort Twente (DIALECT)
Source: MDPI journal article supplement (doi:10.3390/nu9070709), 2017-07-06
Supplement: s1 [file s1]

## Supplementary Table 1 – Data collection in DIALECT

### **Medical history**

Medical history interview, review of electronic patient file

### **Medication use**

Medication interview, drug overview from the pharmacist

### **Questionnaires**

#### *General*

Smoking history, second hand smoking, occupation, nationality

#### *Physical activity*

Short QUestionnaire to ASses Health enhancing physical activity (SQUASH)

#### *Dietary habits*

Food-Frequency Questionnaire (FFQ)

### **Blood pressure**

In a separate room, blood pressure is measured each minute during 15 minutes, while the patient is sitting in a supine position.

### **Physical examination**

#### *General*

Height, weight, waist circumference, hip circumference

#### *Neuropathy*

Monofilament and VibraTip™

#### *Body impedance*

Bodyscan® Quadscan 4000 and the TANITA® BC418MA

### **Laboratory assessments**

#### *Serum*

Hemoglobin, hematocrit, erythrocyte sedimentation rate, leukocyte and platelet count, c-reactive protein, total cholesterol, LDL- and HDL cholesterol, triglycerides, HbA1c, glucose, total bilirubin, aspartate aminotransferase, alanine aminotransferase, alkaline phosphatase, gamma-glutamyl transferase, albumin, total protein, N-terminal prohormone of brain natriuretic peptide, creatinin, eGFR (CKD-epi), urea, uric acid, sodium, potassium, calcium, phosphate, vitamin D, parathyroid hormone, magnesium, thyroid-stimulating hormone, free thyroxine, venous blood gas analysis, lactate

#### *24h urine*

Volume, creatinine excretion, sodium excretion, potassium excretion, calcium excretion, phosphate excretion, urea excretion, uric acid excretion, magnesium excretion, total protein excretion

#### *Morning void urine*

Dipstick test for erythrocytes, leucocytes, glucose, ketones, nitrite and pH

Albumine and albumine-to-creatinine ratio

### **Biobanking**

#### *Serum*

10x serum, 9x EDTA, 1x EDTA + glutathion, 6x citrated, 10x heparin, 1x whole blood

#### *24h urine collection*

10x regular, 5x acidified to pH<2, 5x alcalized to pH>8

#### *Single morning void collection*

5x regular

### **Follow up**

#### *Continuous data*

Blood pressure, Weight, Pharmacological treatment, HbA1c, LDL-cholesterol, eGFR, Urinary albumin-to-creatinine ratio

#### *Endpoints*

Macrovascular events

Microvascular events

Renal events

Mortality, all-cause and cardiovascular
